# Supplementary material for: A Non-Instrumental Green Analytical Method Based on Surfactant-Assisted Dispersive Liquid–Liquid Microextraction–Thin-Layer Chromatography–Smartphone-Based Digital Image Colorimetry(SA-DLLME-TLC-SDIC) for Determining Favipiravir in Biological Samples
Source: MDPI journal article supplement (doi:10.3390/molecules28020529), 2023-01-05
Supplement: s1 [file s1]

# **A Non-Instrumental Green Analytical Method Based on Surfactant-Assisted Dispersive Liquid–Liquid Microextraction–Thin-Layer Chromatography–Smartphone-Based Digital Image Colorimetry(SA-DLLME-TLC-SDIC) for Determining Favipiravir in Biological Samples**

**Bharti Jain <sup>1,2,†</sup>, Rajeev Jain <sup>1,\*,†</sup>, Prashant Kumar Jaiswal <sup>3</sup>, Torki Zughaibi <sup>4,5</sup>, Tanvi Sharma <sup>2</sup>, Abuzar Kabir <sup>6,7</sup>, Ritu Singh <sup>3</sup> and Shweta Sharma <sup>2,\*</sup>**

<sup>1</sup> Central Forensic Science Laboratory, Dakshin Marg, Sector—36A, Chandigarh 160036, India

<sup>2</sup> Institute of Forensic Science & Criminology, Panjab University, Chandigarh 160014, India

<sup>3</sup> School of Earth Sciences, Department of Environmental Sciences, Central University of Rajasthan, NH-8, Bandar Sindri, Ajmer 305817, India

<sup>4</sup> Department of Medical Laboratory Sciences, Faculty of Applied Medical Sciences, King Abdulaziz University, Jeddah 21589, Saudi Arabia

<sup>5</sup> King Fahd Medical Research Center, King Abdulaziz University, Jeddah 21589, Saudi Arabia

<sup>6</sup> International Forensic Research Institute, Department of Chemistry and Biochemistry, Florida International University, Miami, FL 33199, USA

<sup>7</sup> Department of Pharmacy, Faculty of Allied Health Science, Daffodil International University, Dhaka 1207, Bangladesh

\* Correspondence: rajeev.jain-as@gov.in or rajeevjaincfsi@gmail.com (R.J.); 25shweta@pu.ac.in (S.S.)

† These authors contributed equally to this work.

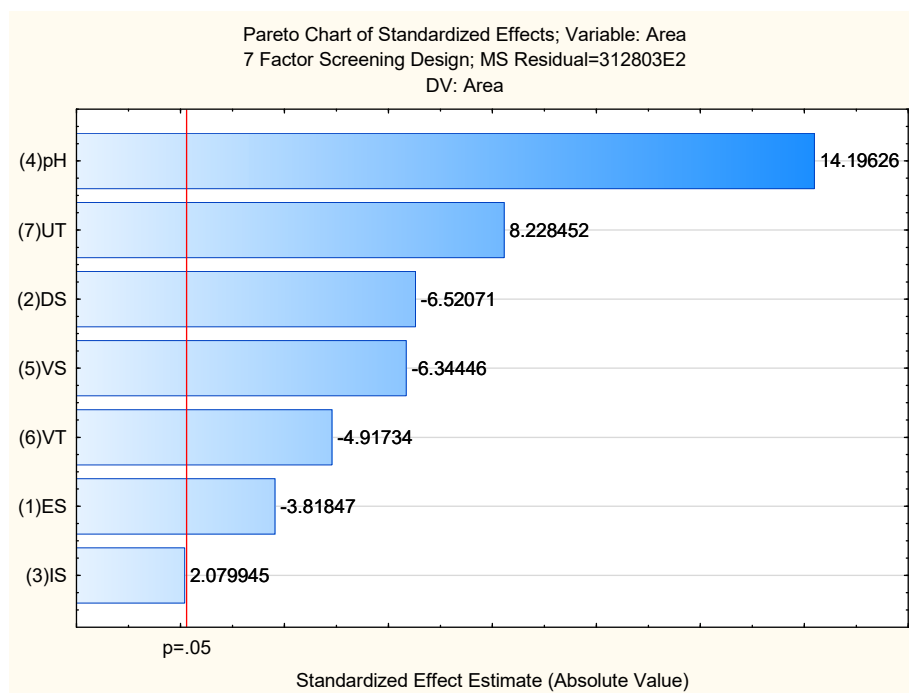

**Figure S1:** Pareto chart for standardized effects.

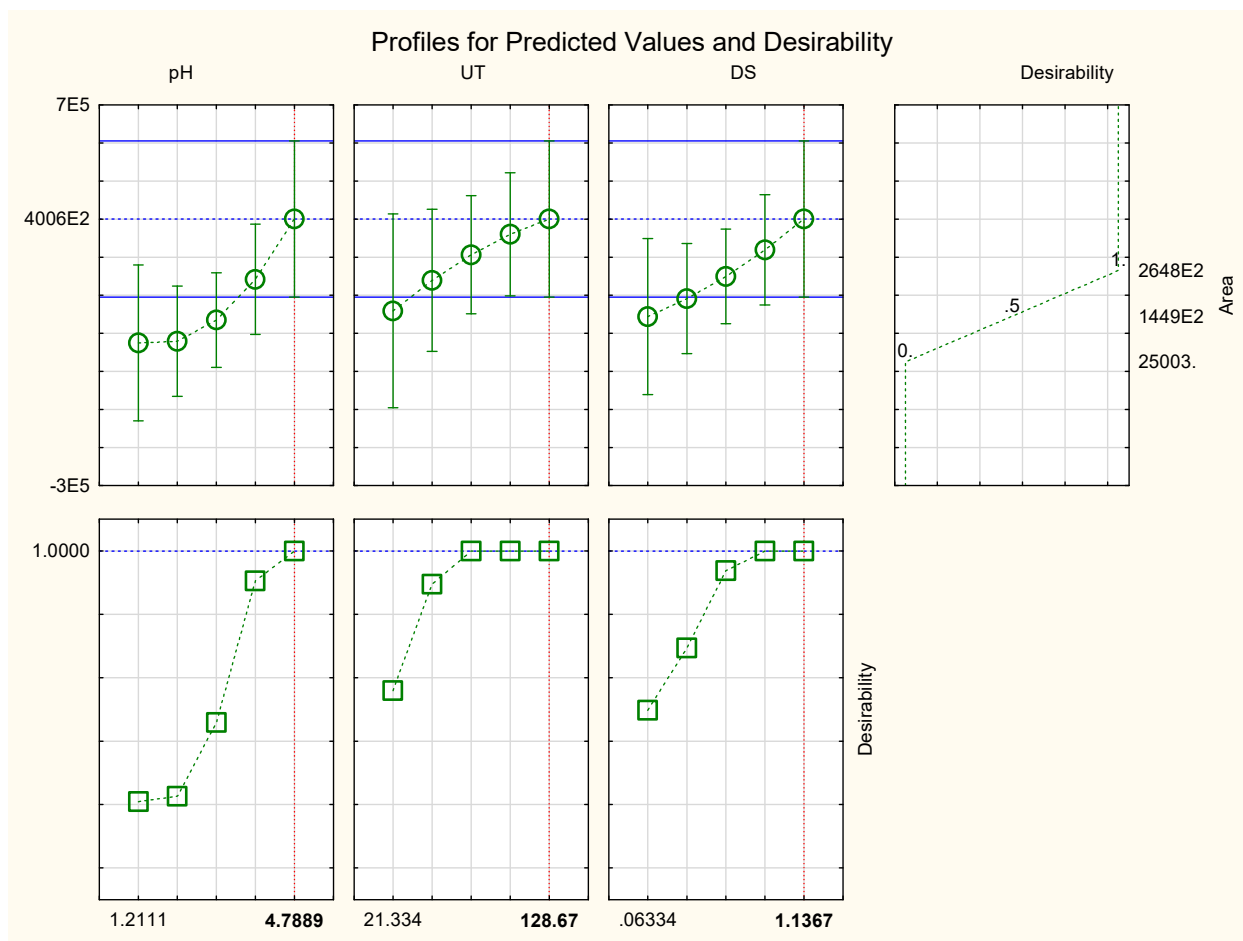

**Figure S2:** Profiles for predicted values and desirability functions for peak responses of FAV. Vertical red line indicates current values after optimization.

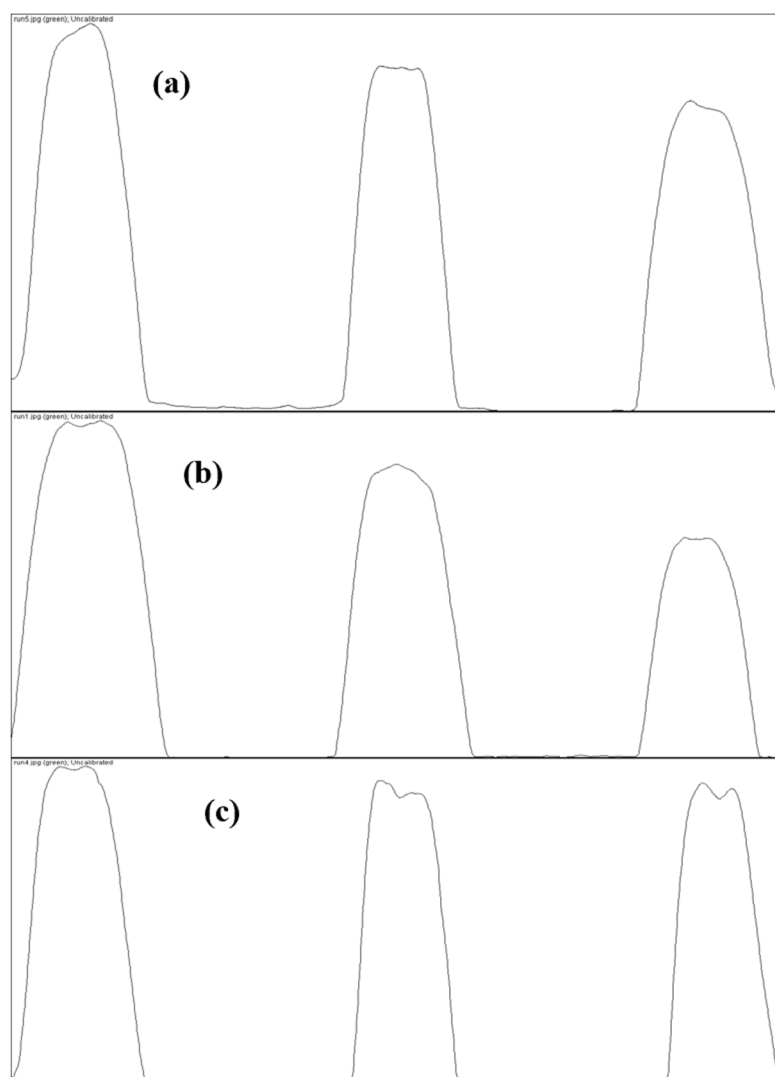

**Figure S3:** TLC densitogram of FAV obtained after SA-DLLME-TLC-SDIC (a) Standard, (b) Urine sample and (c) Plasma sample.

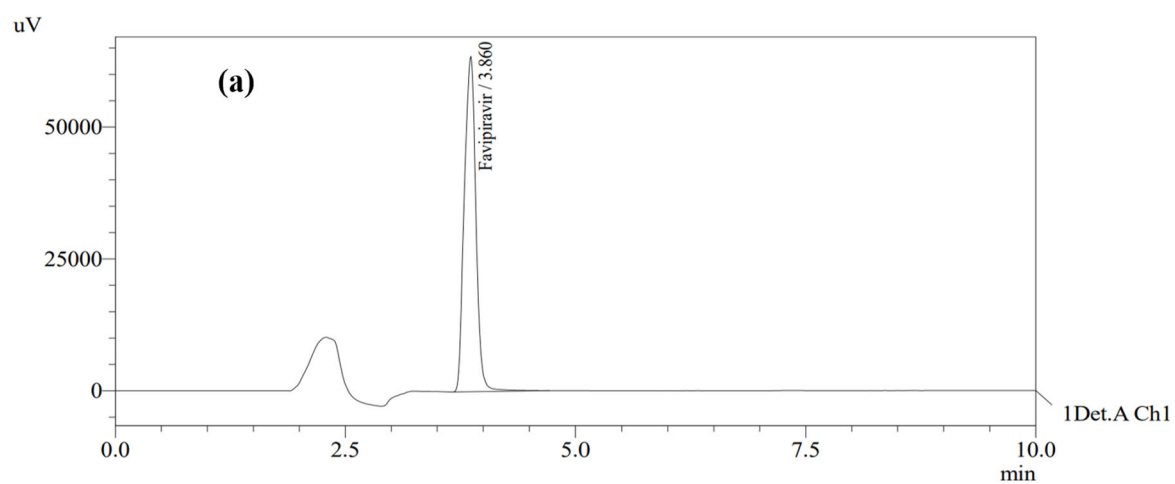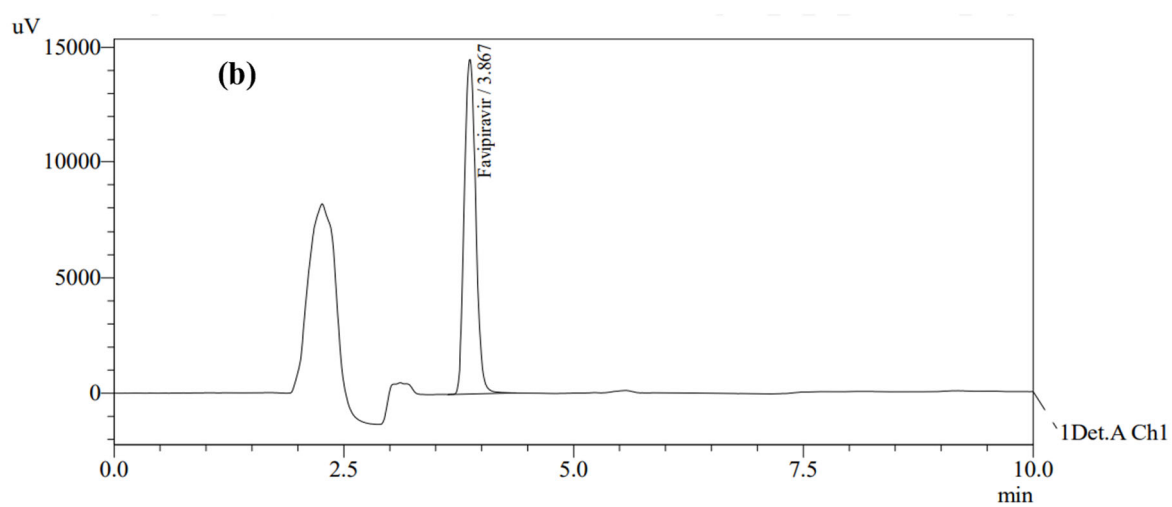

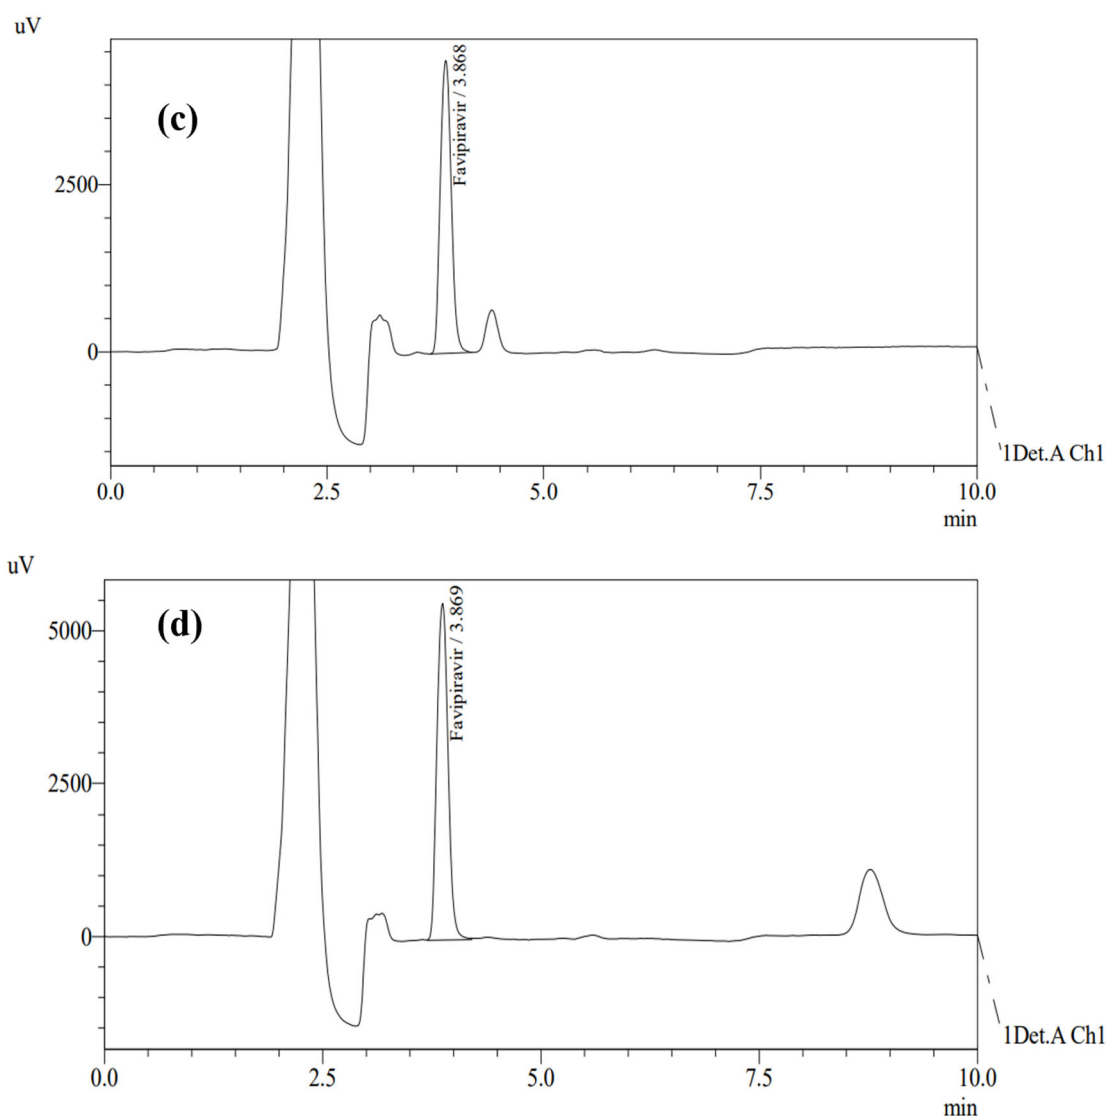

**Figure S4:** HPLC chromatogram of standard sample at  $10 \mu\text{g mL}^{-1}$ (a); and pharmaceutical sample (b); HPLC chromatogram of Urine sample (c); and Plasma sample (d).

**Table S1:** Factors and their levels tested in PBD.

| Factors                                               | Levels   |           |
|-------------------------------------------------------|----------|-----------|
|                                                       | Low (-1) | High (+1) |
| Volume of extraction solvent ( $\mu\text{L}$ )        | 100      | 300       |
| Volume of disperser solvent ( $\text{m mol L}^{-1}$ ) | 0.20     | 0.3       |
| Ionic strength (% NaCl)                               | 5        | 10        |
| pH                                                    | 3        | 8         |
| Vortex timing (sec.)                                  | 30       | 120       |
| Vortex speed (rpm)                                    | 1000     | 3000      |
| Ultrasonic time (sec.)                                | 30       | 120       |

**Table S2:** Factors and their levels tested in CCD.

| Factors                                                 | Levels   |             |           | Star points |           |
|---------------------------------------------------------|----------|-------------|-----------|-------------|-----------|
|                                                         | Low (-1) | Central (0) | High (+1) | $-\alpha$   | $+\alpha$ |
| pH                                                      | 2        | 3           | 4         | 1.2         | 4.7       |
| Ultrasonic time (sec.)                                  | 60       | 75          | 120       | 21          | 128       |
| Volume of disperser solvent<br>(m mol L <sup>-1</sup> ) | 0.30     | 0.60        | 0.90      | 0.06        | 1.13      |

**Table S3:** Experimental design matrix of CCD.

| Standard run | Factors   |                 |                             |
|--------------|-----------|-----------------|-----------------------------|
|              | pH        | Ultrasonic time | Volume of disperser solvent |
| 1            | -1        | -1              | -1                          |
| 2            | -1        | -1              | +1                          |
| 3            | -1        | +1              | -1                          |
| 4            | -1        | +1              | +1                          |
| 5            | +1        | -1              | -1                          |
| 6            | +1        | -1              | +1                          |
| 7            | +1        | +1              | -1                          |
| 8            | +1        | +1              | +1                          |
| 9 (C)        | 0         | 0               | 0                           |
| 10 (C)       | 0         | 0               | 0                           |
| 11           | $-\alpha$ | 0               | 0                           |
| 12           | $+\alpha$ | 0               | 0                           |
| 13           | 0         | $-\alpha$       | 0                           |
| 14           | 0         | $+\alpha$       | 0                           |
| 15           | 0         | 0               | $-\alpha$                   |
| 16           | 0         | 0               | $+\alpha$                   |
| 17 (C)       | 0         | 0               | 0                           |
| 18 (C)       | 0         | 0               | 0                           |
